# Supplementary material
Source: PubMed Central journal article supplement (PMC5827941)
Supplement: NIHMS861302-supplement-1.pdf [file NIHMS861302-supplement-1.pdf]

**Kathleen Doyle** <kathleen.doyle@jove.com>

4:02 PM (6 hours ago)

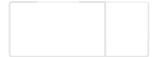

to me

Dear Dr. Zhu,

You have our permission to use Figure 2 from the *JoVE* article "Lee, L. C., Zhihong, Z., Hinson, A., Guccione, J. M. Reduction in Left Ventricular Wall Stress and Improvement in Function in Failing Hearts using Algisyl-LVR. *J. Vis. Exp.*(74), e50096, doi:10.3791/50096 (2013)." in your review as requested.

Please be sure to cite the article accordingly and consider this email as approval. Do not hesitate to email me with any other questions and have a great day.

Best Regards,  
Katie

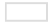

On Tue, Dec 6, 2016 at 5:21 PM, Yang Zhu <[zhuyangzju@gmail.com](mailto:zhuyangzju@gmail.com)> wrote:

Dear Mr./Ms.,

We have submitted a review article to the journal *Biomaterials* of Elsevier. This review has not been accepted yet. In this review we reused Figure 2 from the article "Reduction in Left Ventricular Wall Stress and Improvement in Function in Failing Hearts using Algisyl-LVR" with minor adaption to make the text clearer. We would like to request permission from JOVE for reusing the mentioned content in our review as Elsevier requires copyright clearances. Please inform us the decision with written notice.

Thank you,  
Yang

--

Yang Zhu, M.S.

Department of Bioengineering, University of Pittsburgh

McGowan Institute for Regenerative Medicine

Tel: [412-6245334](tel:412-6245334) (Lab)

Mobile: [412-3394994](tel:412-3394994)

Email: [zhuyangzju@gmail.com](mailto:zhuyangzju@gmail.com), [zhuy@upmc.edu](mailto:zhuy@upmc.edu)

--

Kathleen Doyle  
Peer Review Specialist

[JoVE](#)  
[617.674.1888](tel:617.674.1888)

Follow us: [Facebook](#) | [Twitter](#) | [LinkedIn](#)

[About JoVE](#)
