# Supplementary material
Source: PubMed Central journal article supplement (PMC5827941)
Supplement: NIHMS861302-supplement-7.pdf [file NIHMS861302-supplement-7.pdf]

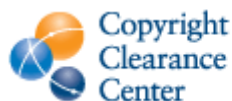

# RightsLink®

[Home](#)[Account Info](#)[Help](#)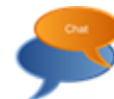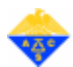

**ACS Publications**  
Most Trusted. Most Cited. Most Read.

**Title:** In Vitro Study of Electroactive Tetraaniline-Containing Thermosensitive Hydrogels for Cardiac Tissue Engineering

**Author:** Haitao Cui, Yadong Liu, Yilong Cheng, et al

**Publication:** Biomacromolecules

**Publisher:** American Chemical Society

**Date:** Apr 1, 2014

Copyright © 2014, American Chemical Society

Logged in as:

Yang Zhu

Account #:  
3000589488

[LOGOUT](#)

## PERMISSION/LICENSE IS GRANTED FOR YOUR ORDER AT NO CHARGE

This type of permission/license, instead of the standard Terms & Conditions, is sent to you because no fee is being charged for your order. Please note the following:

- Permission is granted for your request in both print and electronic formats, and translations.
- If figures and/or tables were requested, they may be adapted or used in part.
- Please print this page for your records and send a copy of it to your publisher/graduate school.
- Appropriate credit for the requested material should be given as follows: "Reprinted (adapted) with permission from (COMPLETE REFERENCE CITATION). Copyright (YEAR) American Chemical Society." Insert appropriate information in place of the capitalized words.
- One-time permission is granted only for the use specified in your request. No additional uses are granted (such as derivative works or other editions). For any other uses, please submit a new request.

If credit is given to another source for the material you requested, permission must be obtained from that source.

[BACK](#)[CLOSE WINDOW](#)

Copyright © 2016 [Copyright Clearance Center, Inc.](#) All Rights Reserved. [Privacy statement.](#) [Terms and Conditions.](#)

Comments? We would like to hear from you. E-mail us at [customercare@copyright.com](mailto:customercare@copyright.com)
