# Supplementary material
Source: PubMed Central journal article supplement (PMC5827941)
Supplement: NIHMS861302-supplement-12.pdf [file NIHMS861302-supplement-12.pdf]

**Order Completed**

Thank you for your order.

This Agreement between Yang Zhu ("You") and Elsevier ("Elsevier") consists of your order details and the terms and conditions provided by Elsevier and Copyright Clearance Center.

|                                                 |                                                                                                                                                                         |
|-------------------------------------------------|-------------------------------------------------------------------------------------------------------------------------------------------------------------------------|
| License number                                  | Reference confirmation email for license number                                                                                                                         |
| License date                                    | Dec 04, 2016                                                                                                                                                            |
| Licensed Content Publisher                      | Elsevier                                                                                                                                                                |
| Licensed Content Publication                    | The Annals of Thoracic Surgery                                                                                                                                          |
| Licensed Content Title                          | Design of a Coupled Thermoresponsive Hydrogel and Robotic System for Postinfarct Biomaterial Injection Therapy                                                          |
| Licensed Content Author                         | Yang Zhu,Nathan A. Wood,Kevin Fok,Tomo Yoshizumi,Dae Woo Park,Hongbin Jiang,David S. Schwartzman,Marco A. Zenati,Takafumi Uchibori,William R. Wagner,Cameron N. Riviere |
| Licensed Content Date                           | September 2016                                                                                                                                                          |
| Licensed Content Volume                         | 102                                                                                                                                                                     |
| Licensed Content Issue                          | 3                                                                                                                                                                       |
| Licensed Content Pages                          | 7                                                                                                                                                                       |
| Type of Use                                     | reuse in a journal/magazine                                                                                                                                             |
| Requestor type                                  | author of new work                                                                                                                                                      |
| Intended publisher of new work                  | Elsevier                                                                                                                                                                |
| Portion                                         | figures/tables/illustrations                                                                                                                                            |
| Number of figures/tables/illustrations          | 5                                                                                                                                                                       |
| Format                                          | both print and electronic                                                                                                                                               |
| Are you the author of this Elsevier article?    | Yes                                                                                                                                                                     |
| Will you be translating?                        | No                                                                                                                                                                      |
| Order reference number                          |                                                                                                                                                                         |
| Original figure numbers                         | Figure 1, 3a, 4a, 4b, S2a and Video S3                                                                                                                                  |
| Title of the article                            | Ventricular wall biomaterial injection therapy after myocardial infarction: Advances in material design, mechanistic insight and early clinical experiences             |
| Publication new article is in                   | Biomaterials                                                                                                                                                            |
| Publisher of the new article                    | Elsevier                                                                                                                                                                |
| Author of new article                           | Yang Zhu, Yasumoto Matsumura, William R. Wagner                                                                                                                         |
| Expected publication date                       | Apr 2017                                                                                                                                                                |
| Estimated size of new article (number of pages) | 16                                                                                                                                                                      |
| Elsevier VAT number                             | GB 494 6272 12                                                                                                                                                          |
| Requestor Location                              | Yang Zhu<br>3154 Avalon St<br><br>Pittsburgh, PA 15219<br>United States<br>Attn: Yang Zhu                                                                               |
| Billing Type                                    | Invoice                                                                                                                                                                 |
| Billing address                                 | Yang Zhu<br>450 Technology Drive<br><br>Pittsburgh, PA 15219                                                                                                            |

United States  
Attn: Yang Zhu  
0.00 USD

Total
